# Supplementary material for: ΜΕΛΕΤΗ ΤΩΝ ΦΥΣΙΚΟΧΗΜΙΚΩΝ ΔΙΕΡΓΑΣΙΩΝ ΕΝΑΝΘΡΑΚΩΣΗΣ ΤΟΥ ΣΚΛΗΡΥΜΕΝΟΥ ΤΣΙΜΕΝΤΟΠΟΛΤΟΥΚΑΙ ΤΩΝ ΕΠΙΠΤΩΣΕΩΝ ΣΤΗΝ ΑΝΘΕΚΤΙΚΟΤΗΤΑ ΣΕ ΔΙΑΡΚΕΙΑ ΤΟΥ Ο...
Source: Royal Society of Chemistry journal article supplement (doi:10.1039/d2na00146b), 1990-01-01
Supplement: d2na00146b1.pdf [file d2na00146b1.pdf]

## Supplementary Information

### A Flexible Dual-gate Hetero-synaptic Transistor for Spatiotemporal Information Processing

Xuerong Liu<sup>1, 2, 3, 6</sup>, Cui Sun<sup>2, 3, 6</sup>, Zhecheng Guo<sup>4</sup>, Yuejun Zhang<sup>4</sup>, Zheng Zhang<sup>5</sup>, Jie Shang<sup>2, 3</sup>, Zhicheng Zhong<sup>2, 3</sup>, Xiaojian Zhu<sup>2, 3\*</sup>, Xue Yu<sup>1\*</sup>, Run-Wei Li<sup>2, 3</sup>

<sup>1</sup> Faculty of Materials Science and Engineering, Kunming University of Science and Technology, Kunming 650093, China.

<sup>2</sup> CAS Key Laboratory of Magnetic Materials and Devices, Ningbo Institute of Materials Technology and Engineering, Chinese Academy of Sciences, Ningbo 315201, China

<sup>3</sup> Zhejiang Province Key Laboratory of Magnetic Materials and Application Technology, Ningbo Institute of Materials Technology and Engineering, Chinese Academy of Sciences, Ningbo 315201, China

<sup>4</sup> Faculty of Electrical Engineering and Computer Science, Ningbo University, Ningbo 315211, China

<sup>5</sup> Key Laboratory of Magnetic Molecules and Magnetic Information Materials of Ministry of Education, School of Chemistry and Materials Science, Shanxi Normal University, 339 Taiyu Road, Taiyuan 030024, China

<sup>6</sup> These authors contributed equally to this work.

\*Corresponding author : [zhuxj@nimte.ac.cn](mailto:zhuxj@nimte.ac.cn), [yuyu6593@126.com](mailto:yuyu6593@126.com)

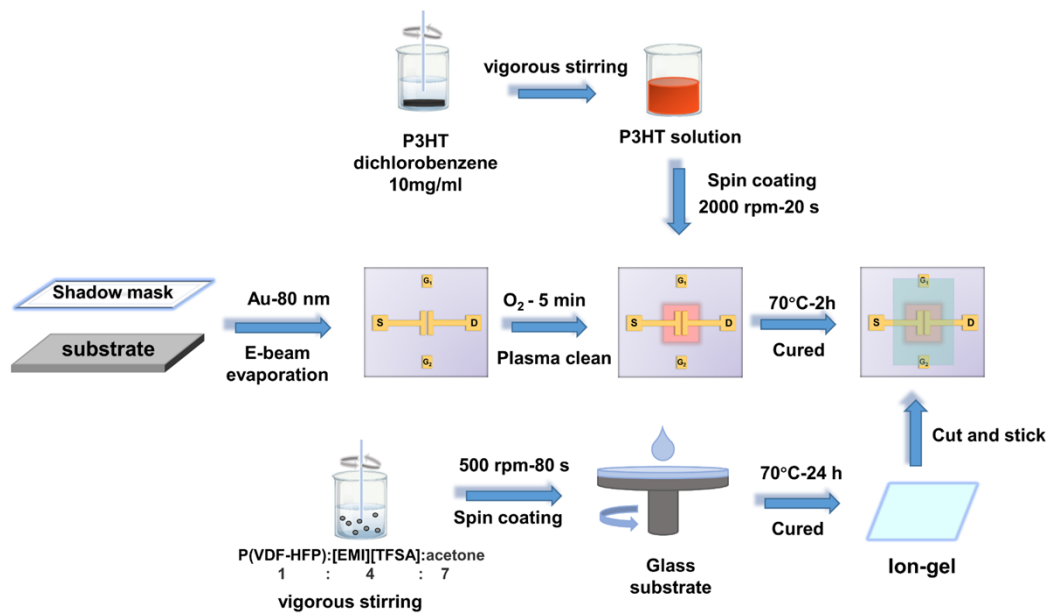

**Figure S1.** The flowchart showing the fabrication process of the transistor device.

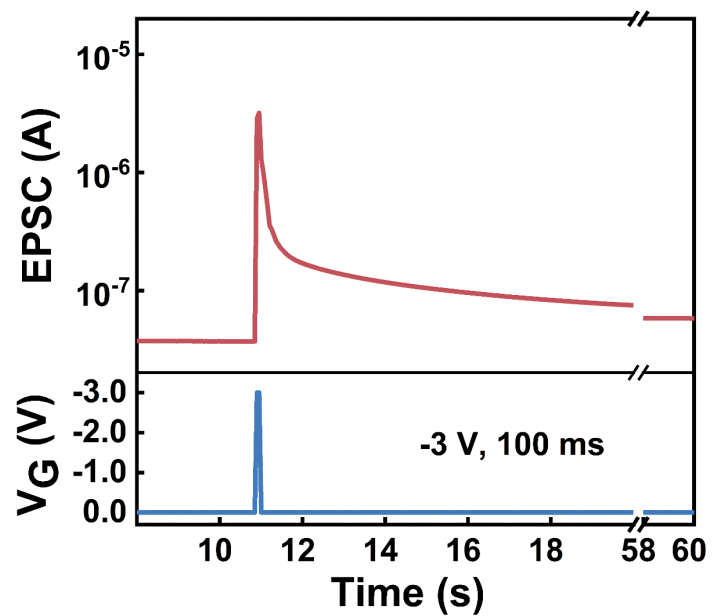

**Figure S2** A typical LTP effect obtained in the electrolyte gated transistor triggered by an electric pulse (-3 V, 100 ms) applied on a single gate.

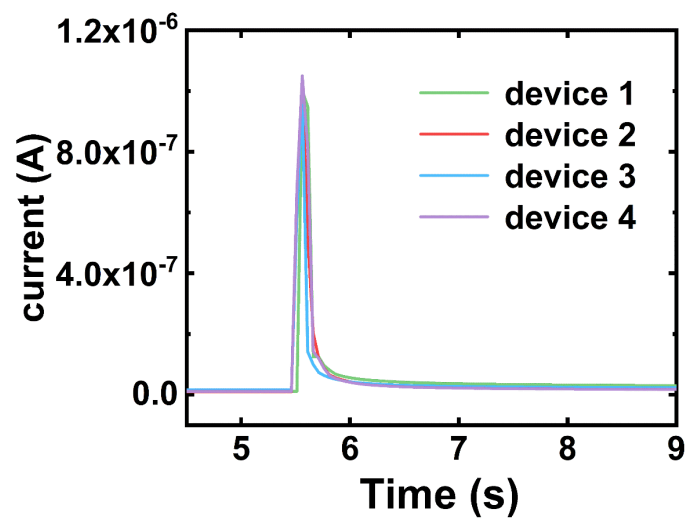

**Figure S3** Current response of four P3HT based transistor devices to a single electric pulse (-1.5 V, 100 ms).
